# Supplementary material
Source: publisher site journal article supplement (https://www.dovepress.com/article/493135)
Supplement: Supplementary file 1 [file 493135-Supplementary-Tables-1-3_1.doc]

Supplemental Table 1. Survey Categorical Data Statistics

| Categories | Features | Factor Levels | Counts | Frequency |
| --- | --- | --- | --- | --- |
| Social Economics |  |  |  |  |
|  | Sex |  |  |  |
|  |  | Male | 7340 | 52.8% |
|  |  | Female | 6556 | 47.2% |
|  | Age |  |  |  |
|  |  | Infants (≤ 1 year old) | 1595 | 11.5% |
|  |  | Toddlers ( 1 < age < 2 years old) | 2510 | 18.1% |
|  |  | Preschoolers (2 - 6 years old) | 9791 | 70.5% |
|  | Location |  |  |  |
|  |  | North | 10910 | 78.5% |
|  |  | South | 2986 | 21.5% |
|  | Guardian |  |  |  |
|  |  | Parent | 673 | 79.6% |
|  |  | Grandparent | 166 | 19.6% |
|  |  | Nanny | 7 | 0.8% |
|  | Father's Education |  |  |  |
|  |  | College | 1591 | 59.9% |
|  |  | Middle School | 797 | 30.0% |
|  |  | Graduate School | 225 | 8.5% |
|  |  | Elementary School | 43 | 1.6% |
|  | Mother's Education |  |  |  |
|  |  | College | 1590 | 60.4% |
|  |  | Middle School | 802 | 30.4% |
|  |  | Graduate School | 206 | 7.8% |
|  |  | Elementary School | 36 | 1.4% |
|  | Monthly Income (Chinese Yuan) |  |  |  |
|  |  | >8000 | 968 | 36.2% |
|  |  | 3000 - 5000 | 763 | 28.6% |
|  |  | 5000 - 8000 | 740 | 27.7% |
|  |  | 1000 - 3000 | 169 | 6.3% |
|  |  | < 1000 | 26 | 1.0% |
|  |  | 0 | 6 | 0.2% |
|  | Age at the Onset of Overweight |  |  |  |
|  |  | Unknown | 260 | 26.8% |
|  |  | 1 | 215 | 22.2% |
|  |  | 2 | 175 | 18.0% |
|  |  | 0 | 96 | 9.9% |
|  |  | 3 | 83 | 8.6% |
|  |  | 5 | 78 | 8.0% |
|  |  | 4 | 54 | 5.6% |
|  |  | 6 | 9 | 0.9% |
| Dietary Habits |  |  |  |  |
|  | Feeding First Four Months |  |  |  |
|  |  | pure breast milk | 1376 | 53.9% |
|  |  | breast milk-based mixed feeding | 598 | 23.4% |
|  |  | artificial feeding | 292 | 11.4% |
|  |  | Non-breast-based mixed feeding | 288 | 11.3% |
|  | First Mashed Food |  |  |  |
|  |  | rice noodles | 1387 | 62.2% |
|  |  | egg yolk | 447 | 20.0% |
|  |  | other | 260 | 11.7% |
|  |  | fruit puree | 61 | 2.7% |
|  |  | custard | 42 | 1.9% |
|  |  | liver puree | 30 | 1.3% |
|  |  | meat puree | 3 | 0.1% |
|  | First Solid Food |  |  |  |
|  |  | noodles | 1114 | 55.3% |
|  |  | rice | 262 | 13.0% |
|  |  | vegetables | 250 | 12.4% |
|  |  | fruit | 207 | 10.3% |
|  |  | steamed buns | 132 | 6.5% |
|  |  | fish and shrimp | 28 | 1.4% |
|  |  | meat | 22 | 1.1% |
|  |  | other | 1 | 0.0% |
|  | Consumed MilkProduct One Hour Before Sleep |  |  |  |
|  |  | yes | 1096 | 61.4% |
|  |  | no | 643 | 36.0% |
|  |  | unknown | 47 | 2.6% |
|  | Consumed Snacks One Hour Before Sleeping |  |  |  |
|  |  | no | 1039 | 59.5% |
|  |  | yes | 654 | 37.5% |
|  |  | unknown | 52 | 3.0% |
|  | Consumption of Staple Food One Hour Before Sleep |  |  |  |
|  |  | no | 1328 | 78.9% |
|  |  | yes | 309 | 18.4% |
|  |  | unknown | 46 | 2.7% |
| Life Style |  |  |  |  |
|  | Watching Food Ads |  |  |  |
|  |  | no | 1204 | 66.2% |
|  |  | yes | 572 | 31.4% |
|  |  | unknown | 42 | 2.3% |
|  | Current Appetite |  |  |  |
|  |  | good | 996 | 54.3% |
|  |  | average | 714 | 38.9% |
|  |  | poor | 82 | 4.5% |
|  |  | unknown | 43 | 2.3% |
|  | Eating Speed |  |  |  |
|  |  | fast | 1069 | 58.1% |
|  |  | average | 435 | 23.7% |
|  |  | slow | 293 | 15.9% |
|  |  | unknown | 42 | 2.3% |
|  | Wathcing TV While Eating |  |  |  |
|  |  | no | 1010 | 55.6% |
|  |  | yes | 766 | 42.2% |
|  |  | unknown | 40 | 2.2% |
|  | Out Eating Frenquency Father |  |  |  |
|  |  | 2-3 times a month | 643 | 35.8% |
|  |  | less than once a month | 418 | 23.2% |
|  |  | more than 2-3 times a week | 393 | 21.9% |
|  |  | once a week | 299 | 16.6% |
|  |  |  | 45 | 2.5% |
|  | Out Eating Frenquency Mother |  |  |  |
|  |  | 2-3 times a month | 642 | 35.8% |
|  |  | less than once a month | 626 | 35.0% |
|  |  | once a week | 282 | 15.7% |
|  |  | more than 2-3 times a week | 194 | 10.8% |
|  |  |  | 47 | 2.6% |
|  | Out Eating Frenquency Children |  |  |  |
|  |  | 2-3 times a month | 660 | 37.6% |
|  |  | once a week | 458 | 26.1% |
|  |  | less than once a month | 409 | 23.3% |
|  |  | more than 2-3 times a week | 183 | 10.4% |
|  |  |  | 47 | 2.7% |
|  | When Go Bed |  |  |  |
|  |  | Before 22:00:00 | 1712 | 94.2% |
|  |  | 22:00:00 or later | 105 | 5.8% |
|  | When Get Up |  |  |  |
|  |  | 6:00:00 to 9:00:00 | 1754 | 96.6% |
|  |  | after 9:00:00 | 33 | 1.8% |
|  |  | before 6:00:00 | 29 | 1.6% |
|  | Snack While WatchingTV |  |  |  |
|  |  | no | 1137 | 64.5% |
|  |  | yes | 625 | 35.5% |
|  | Father Perception Of Children Body Type |  |  |  |
|  |  | well proportioned | 1238 | 53.3% |
|  |  | slightly fat | 554 | 23.9% |
|  |  | slightly thin | 316 | 13.6% |
|  |  | too fat | 158 | 6.8% |
|  |  | too thin | 55 | 2.4% |
|  | Mother Perception Of Children Body Type |  |  |  |
|  |  | well proportioned | 1367 | 53.8% |
|  |  | slightly fat | 599 | 23.6% |
|  |  | slightly thin | 343 | 13.5% |
|  |  | too fat | 167 | 6.6% |
|  |  | too thin | 65 | 2.6% |
|  | Grandpa Perception Of Children Body Type |  |  |  |
|  |  | well proportioned | 1236 | 53.3% |
|  |  | slightly fat | 524 | 22.6% |
|  |  | slightly thin | 338 | 14.6% |
|  |  | too fat | 151 | 6.5% |
|  |  | too thin | 72 | 3.1% |
|  | Father Perception Of Children Physical Activities |  |  |  |
|  |  | appropriate | 1704 | 73.2% |
|  |  | too little | 472 | 20.3% |
|  |  | too much | 153 | 6.6% |
|  | Mother Perception Of Children Physical Activities |  |  |  |
|  |  | appropriate | 1871 | 73.4% |
|  |  | too little | 484 | 19.0% |
|  |  | too much | 194 | 7.6% |
|  | Grandpa Perception Of Children Physical Activities |  |  |  |
|  |  | appropriate | 1724 | 74.2% |
|  |  | too little | 439 | 18.9% |
|  |  | too much | 159 | 6.8% |
|  | Father Perception Of Children Eating |  |  |  |
|  |  | appropriate | 1731 | 74.5% |
|  |  | too little | 313 | 13.5% |
|  |  | too much | 281 | 12.1% |
|  | Mother Perception Of Children Eating |  |  |  |
|  |  | appropriate | 1910 | 74.8% |
|  |  | too little | 341 | 13.4% |
|  |  | too much | 302 | 11.8% |
|  | Grandpa Perception Of Children Eating |  |  |  |
|  |  | appropriate | 1701 | 73.1% |
|  |  | too little | 360 | 15.5% |
|  |  | too much | 266 | 11.4% |
|  | Father Perception Of Children Sleep Time |  |  |  |
|  |  | appropriate | 1904 | 81.6% |
|  |  | too little | 385 | 16.5% |
|  |  | too long | 43 | 1.8% |
|  | Mother Perception Of Children Sleep Time |  |  |  |
|  |  | appropriate | 2093 | 82.0% |
|  |  | too little | 413 | 16.2% |
|  |  | too long | 46 | 1.8% |
|  | Grandpa Perception Of Children Sleep Time |  |  |  |
|  |  | appropriate | 1902 | 81.8% |
|  |  | too little | 380 | 16.4% |
|  |  | too long | 42 | 1.8% |
|  | Father Perception Of Children Overweight |  |  |  |
|  |  | bad | 2057 | 88.7% |
|  |  | no harm to health | 187 | 8.1% |
|  |  | good | 75 | 3.2% |
|  | Mother Perception Of Children Overweight |  |  |  |
|  |  | bad | 2274 | 89.4% |
|  |  | no harm to health | 192 | 7.5% |
|  |  | good | 78 | 3.1% |
|  | Grandpa Perception Of Children Overweight |  |  |  |
|  |  | bad | 1998 | 86.2% |
|  |  | no harm to health | 238 | 10.3% |
|  |  | good | 82 | 3.5% |

Supplemental Table 2. Data distribution of numerical data variables

| Data Features | Count | Mean | Standard Deviation | Minimal | Lower Quartiles | Median | Higher Quartiles | Maximal |
| --- | --- | --- | --- | --- | --- | --- | --- | --- |
| Weight | 13896 | 14.89 | 5.63 | 3.1 | 10.3 | 15 | 18.5 | 53.01 |
| Height | 13894 | 93.62 | 18.56 | 47.8 | 76.5 | 98.5 | 108.1 | 147 |
| BMI | 13894 | 16.53 | 1.99 | 8.13 | 15.24 | 16.33 | 17.63 | 35.75 |
| Waist Size | 10757 | 49.10 | 7.15 | 30 | 44.2 | 48.2 | 53 | 93 |
| Hip Size | 10757 | 53.25 | 8.88 | 20.5 | 47 | 52.4 | 59.1 | 112 |
| Leg Size | 8625 | 29.66 | 5.36 | 14 | 26 | 29.8 | 33.1 | 59.8 |
| BP Sys | 3594 | 90.48 | 11.15 | 30 | 84 | 90 | 100 | 132 |
| BP Dial | 3359 | 57.83 | 9.95 | 30 | 50 | 60 | 60 | 100 |
| Birth Weight | 2697 | 3.41 | 0.53 | 1.1 | 3.1 | 3.4 | 3.7 | 6.6 |
| Birth Height | 2649 | 50.88 | 2.54 | 35 | 50 | 50 | 52 | 68 |
| Father Age | 2694 | 33.86 | 4.99 | 20 | 30 | 34 | 36 | 65 |
| Father's Height | 2706 | 174.60 | 5.31 | 129 | 170 | 175 | 178 | 195 |
| Father's Weight | 2608 | 49.86 | 17.52 | 30 | 36.25 | 42.5 | 65 | 130 |
| Mother Age | 2699 | 31.82 | 4.38 | 15 | 29 | 31 | 34 | 66 |
| Mother's Height | 2705 | 162.24 | 4.76 | 120 | 160 | 162 | 165 | 178 |
| Mother's Weight | 2678 | 59.24 | 9.20 | 30 | 53.5 | 59 | 65 | 105 |
| Month Weaning | 2221 | 33.54 | 39.54 | 0 | 6 | 12 | 99 | 99 |
| Month Mashed Food | 2564 | 16.77 | 29.88 | 0 | 5 | 6 | 6.25 | 99 |
| Month Solid Food | 2503 | 27.63 | 36.61 | 0 | 8 | 9 | 14 | 99 |
| Weekly Icecream Consumption Frequency | 1481 | 1.72 | 10.54 | 0 | 0 | 0 | 1 | 99 |
| Weekly Vgetable Leaf Consumption Frequency | 1652 | 7.53 | 15.98 | 0 | 2 | 5 | 7 | 99 |
| Weekly Root Vegetable Consumption Frequency | 1655 | 6.25 | 15.89 | 0 | 2 | 3 | 5 | 99 |
| Weekly Candy Consumption Frequency | 1067 | 3.39 | 13.96 | 0 | 0 | 1 | 2 | 99 |
| Weekly Dinner Frequency | 1805 | 3.46 | 6.13 | 0 | 3 | 3 | 3 | 99 |
| Candy Consumption Frequency | 1780 | 2.91 | 8.97 | 0 | 1 | 2 | 2 | 99 |
| Gaming Hours | 1647 | 0.29 | 0.65 | 0 | 0 | 0 | 0.5 | 9 |

Supplemental Table 3. Logistic regression analysis of the data features of overweight/obesity

| Influential Data Features | Factors | Adjusted OR (95% CI) | Pr(>|Z|) | Odds Ratio | Lower_CI | Upper_CI |
| --- | --- | --- | --- | --- | --- | --- |
| Guardian | Grandparents | 0.02(0.01~0.09) | <0.0001 | 0.02 | 0.01 | 0.09 |
|  | Parents | 0.03(0.01~0.09) | <0.0001 | 0.03 | 0.01 | 0.09 |
| Father's Height |  | 0.98(0.97~0.99) | 0.003 | 0.98 | 0.97 | 0.99 |
| The Frequency of weekly Candy Consumption |  | 0.98(0.96~1.00) | 0.0414 | 0.98 | 0.96 | 1.00 |
| Mother's Weight |  | 1.02(1.00~1.03) | 0.0106 | 1.02 | 1.00 | 1.03 |
| Leg Size |  | 1.07(1.05~1.09) | <0.0001 | 1.07 | 1.05 | 1.09 |
| Waist Size |  | 1.09(1.08~1.11) | <0.0001 | 1.09 | 1.08 | 1.11 |
| Age at the Onset of Overweight |  | 3.03(2.49~3.70) | <0.0001 | 3.03 | 2.49 | 3.70 |
| Age Group | Preschool | 3.37(2.28~4.99) | <0.0001 | 3.37 | 2.28 | 4.99 |
| Mother's Education | College | 3.22(1.13~9.20) | 0.0287 | 3.22 | 1.13 | 9.20 |
|  | Highschool | 3.82(1.36~10.70) | 0.0109 | 3.82 | 1.36 | 10.70 |
|  | Graduate School | 5.13(1.57~16.74) | 0.0067 | 5.13 | 1.57 | 16.74 |
| Interaction terms between gender and data features |  |  |  |  |  |  |
| The Frequency of Weekly Candy | Girls | 0.89(0.78~1.00) | 0.0531 | 0.89 | 0.78 | 1.00 |
| The Frequency of Weekly Western Fastfood | Girls | 0.89(0.81~0.98) | 0.0127 | 0.89 | 0.81 | 0.98 |
| Leg Size | Girls | 0.96(0.92~1.00) | 0.0309 | 0.96 | 0.92 | 1.00 |
| The Frequency of Weekly Fruit | Girls | 0.96(0.92~1.00) | 0.0518 | 0.96 | 0.92 | 1.00 |
| Father Weight | Girls | 1.05(1.01~1.09) | 0.006 | 1.05 | 1.01 | 1.09 |
| The Frequency of Sweet Cookies | Girls | 1.07(1.01~1.14) | 0.0226 | 1.07 | 1.01 | 1.14 |
| The Frequency of Weekly Dinner | Girls | 1.10(1.00~1.21) | 0.0488 | 1.10 | 1.00 | 1.21 |
